# Supplementary material for: Multiphoton microscopy and tissue clearing for 3D characterization of the vasculature and fibrosis remodeling in rat dystrophic skeletal muscle
Source: Research Square preprint supplement (doi:10.21203/rs.3.rs-6156479/v1), 2025-06-11
Supplement: Supplementary file 1 [file fefb0bd8e9bc6e5ba939cdb2.docx]

**Supplementary datas:**


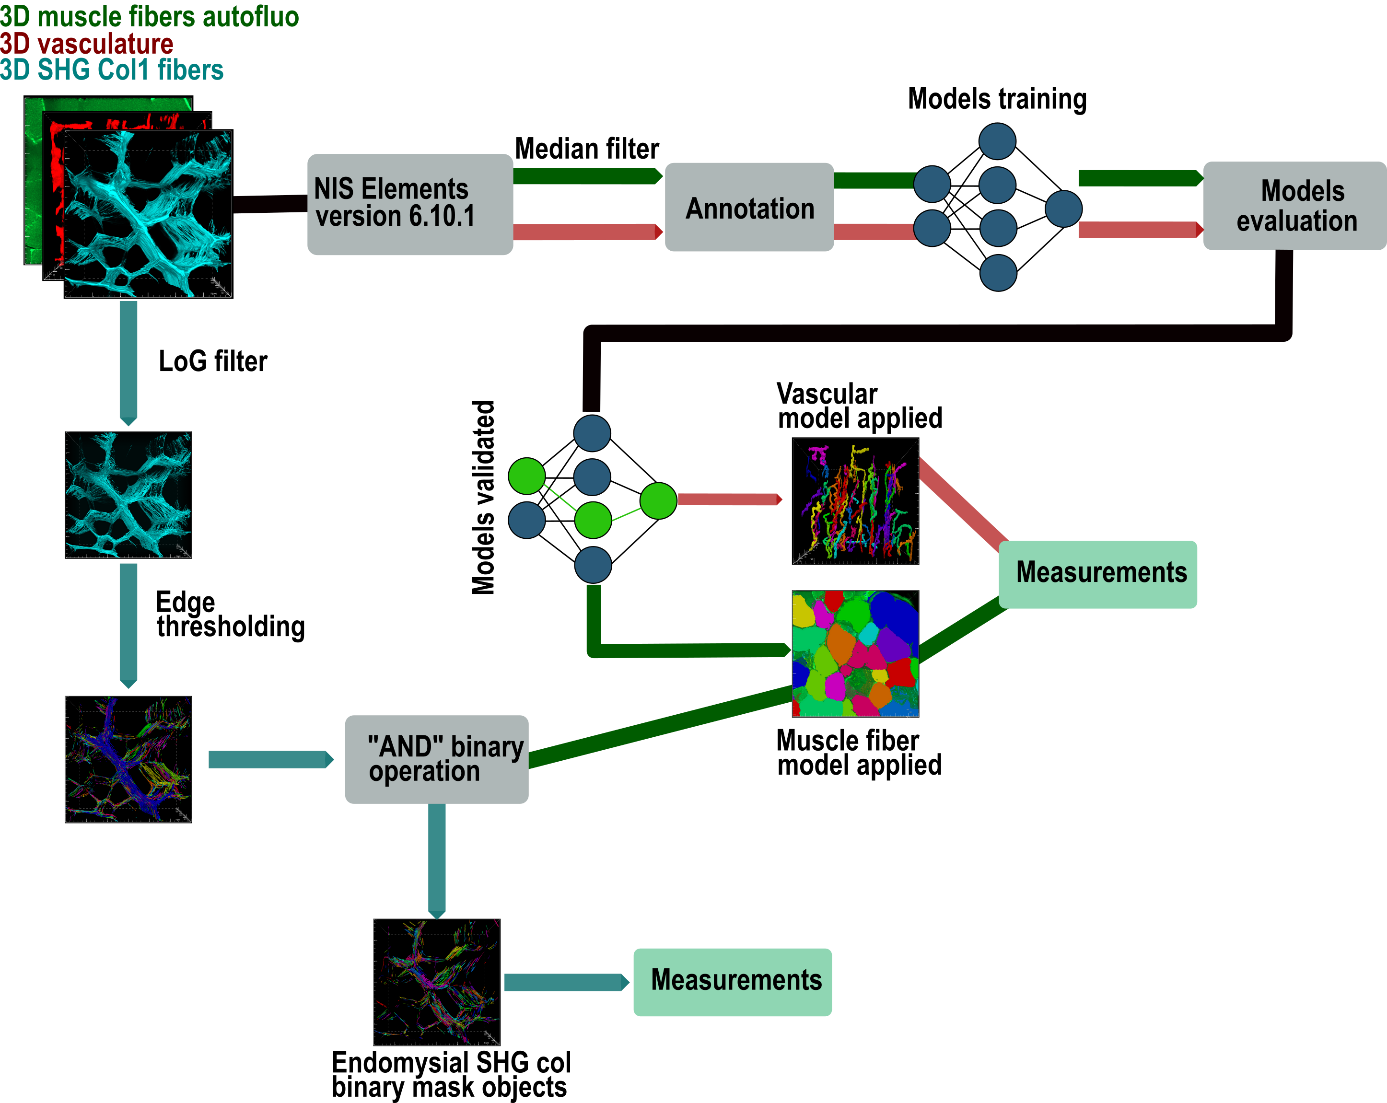


**Figure S1:** Image processing workflow for vasculature and fibrosis analysis. A step-by-step workflow was implemented for the analysis of vasculature and fibrosis in dystrophic muscle.

**Preprocessing.** A median filter with a kernel size of 3 × 3 was applied to green autofluorescence images of muscle fibers to reduce pepper noise and enhance muscle boundaries.

**Annotation and training.** Muscle fibers: Seven cropped images (400 × 400 × 10 µm) containing 20 fibers each were annotated manually using NIS-Elements software (version 6.10.1, Nikon Europe BV).

Vessels: Three cropped images (200 × 200 × 300 µm) were manually annotated.

**Segmentation Models.** Muscle fibers: The “*SegmentObject.ai*” model, specifically designed for densely packed structures, was used. This model includes a step for separating contiguous objects. Vessels: The “*Segment.ai*” model was used.

**Training details.** Training for muscle fibers included three rounds of at least 2,500 epochs. Training for vessels consisted of two sessions of 500 epochs.

All trainings were conducted on an HP Z4 workstation equipped with an NVIDIA RTX5000 graphics unit (Driver version 516.40, NVIDIA).

**Validation.** The models were validated on eight test images for both muscle fibers and vessels. Performance metrics, including loss function, precision, recall, F1-score, and Intersection Over Union (IoU), were calculated.


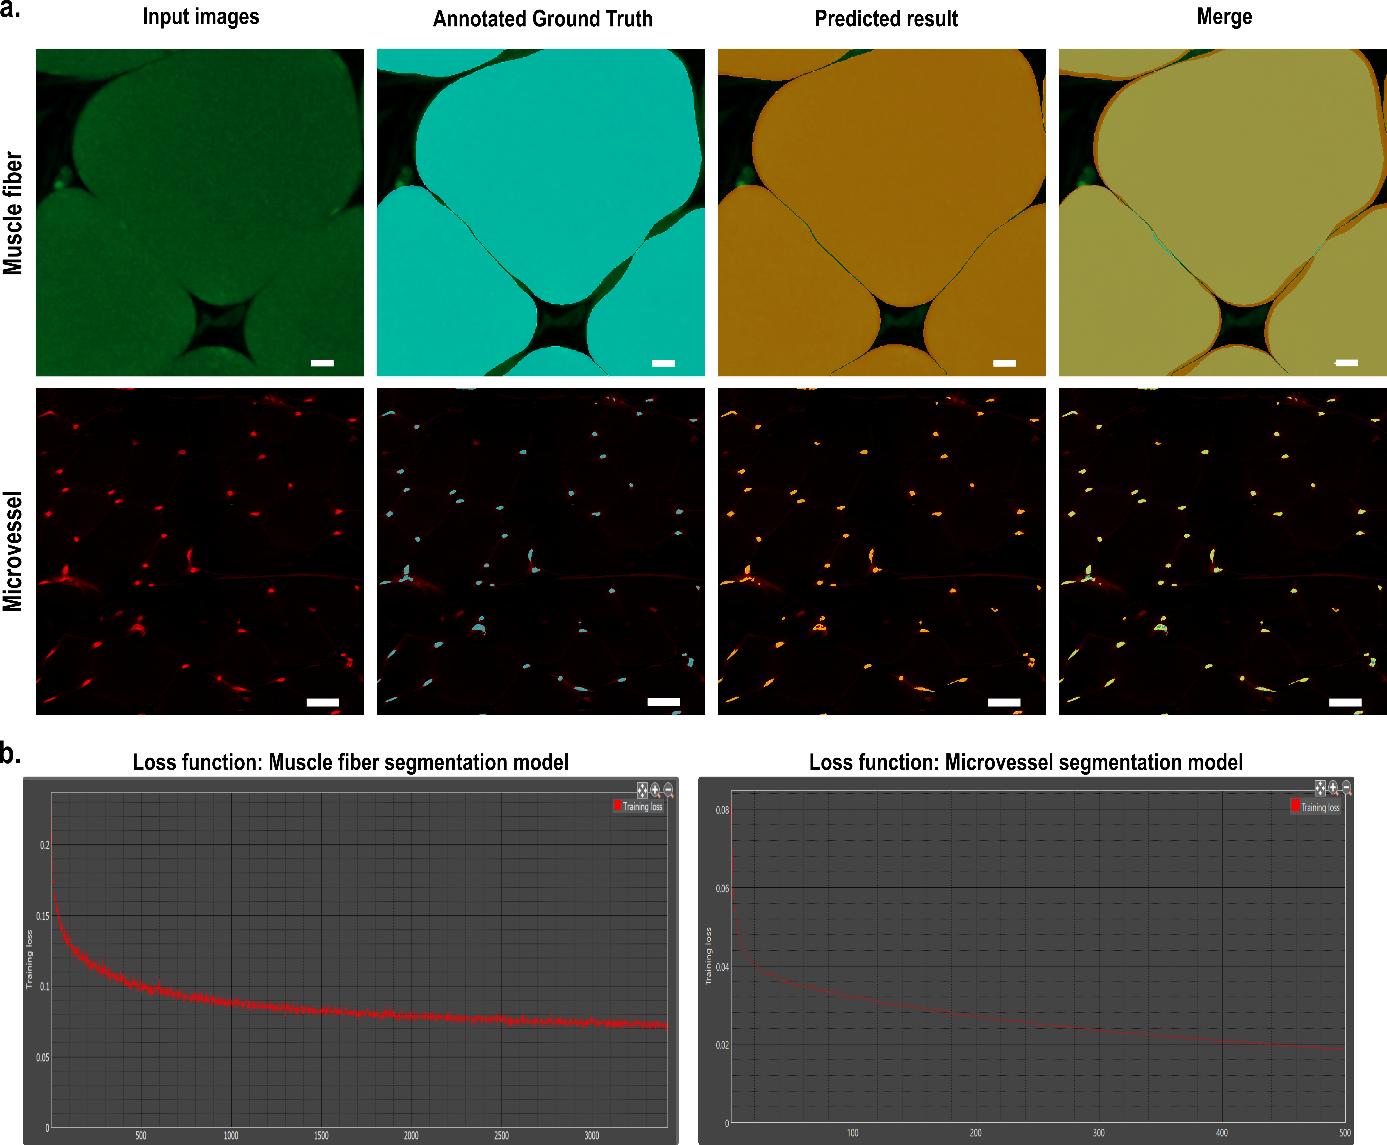


**Figure S2:** (a) Cropped images illustrate the effectiveness of the predictions made by the deep learning models for muscle fibers and microvessels. The segmented outputs demonstrate high fidelity in accurately identifying and delineating these structures from the input data. Scale bar: 10 µm for muscle fibers; 50 µm for microvessels. (b) The loss functions of both models are shown as a result of the training process. The x-axis represents the iteration steps, while the y-axis represents the corresponding loss values. The progressive reduction in the loss function during training indicates convergence and improved model performance over time.

| Precision | Recall | F1 | IoU |
| --- | --- | --- | --- |
| 0,818613 | 0,928172 | 0,869957 | 0,769844 |
| 0,875018 | 0,932336 | 0,902769 | 0,822769 |
| 0,878735 | 0,899686 | 0,889087 | 0,800321 |
| 0,989785 | 0,581503 | 0,7326 | 0,578033 |
| 0,973131 | 0,748988 | 0,846473 | 0,733813 |
| 0,98126 | 0,60289 | 0,746889 | 0,596027 |
| 0,98126 | 0,60289 | 0,746889 | 0,596027 |
| 0,864182 | 0,87377 | 0,86895 | 0,768268 |

**Table S1:** Metrics evaluated for microvessel model segmentation for eight images

| Precision | Recall | F1 | IoU |
| --- | --- | --- | --- |
| 0,953489 | 0,999011 | 0,975719 | 0,95259 |
| 0,875018 | 0,932336 | 0,902769 | 0,822769 |
| 0,878735 | 0,899686 | 0,889087 | 0,800321 |
| 0,864182 | 0,87377 | 0,86895 | 0,768268 |
| 0,973131 | 0,748988 | 0,846473 | 0,733813 |
| 0,98126 | 0,60289 | 0,746889 | 0,596027 |
| 0,664947 | 0,95938 | 0,785479 | 0,646739 |
| 0,989785 | 0,581503 | 0,7326 | 0,578033 |

**Table S2:** Metrics evaluated for muscle fibers model segmentation for eight images

Analysis and Feature Extraction: The trained models were applied for automated segmentation, followed by feature measurements of interest, such as vessel morphology and fiber-vessel interactions.

**SHG-Collagen analysis**. A denoising algorithm, “*Denoise.ai*” was applied followed by a Laplacian of Gaussian (LoG) filter with a sigma value of 2.7 to enhance SHG-collagen fiber boundaries.

**:** The standard deviation of the Gaussian function, which controls the amount of smoothing.

Spatial coordinates in the image.

Laplacian termwhich computes the second derivative.

Edge thresholding was then used to detect SHG-collagen structures. Endomysial SHG-collagen structures were selected by applying a binary operation between SHG-collagen objects and muscle fiber masks, enabling quantification of relevant features.

**General analysis pipeline.**

**
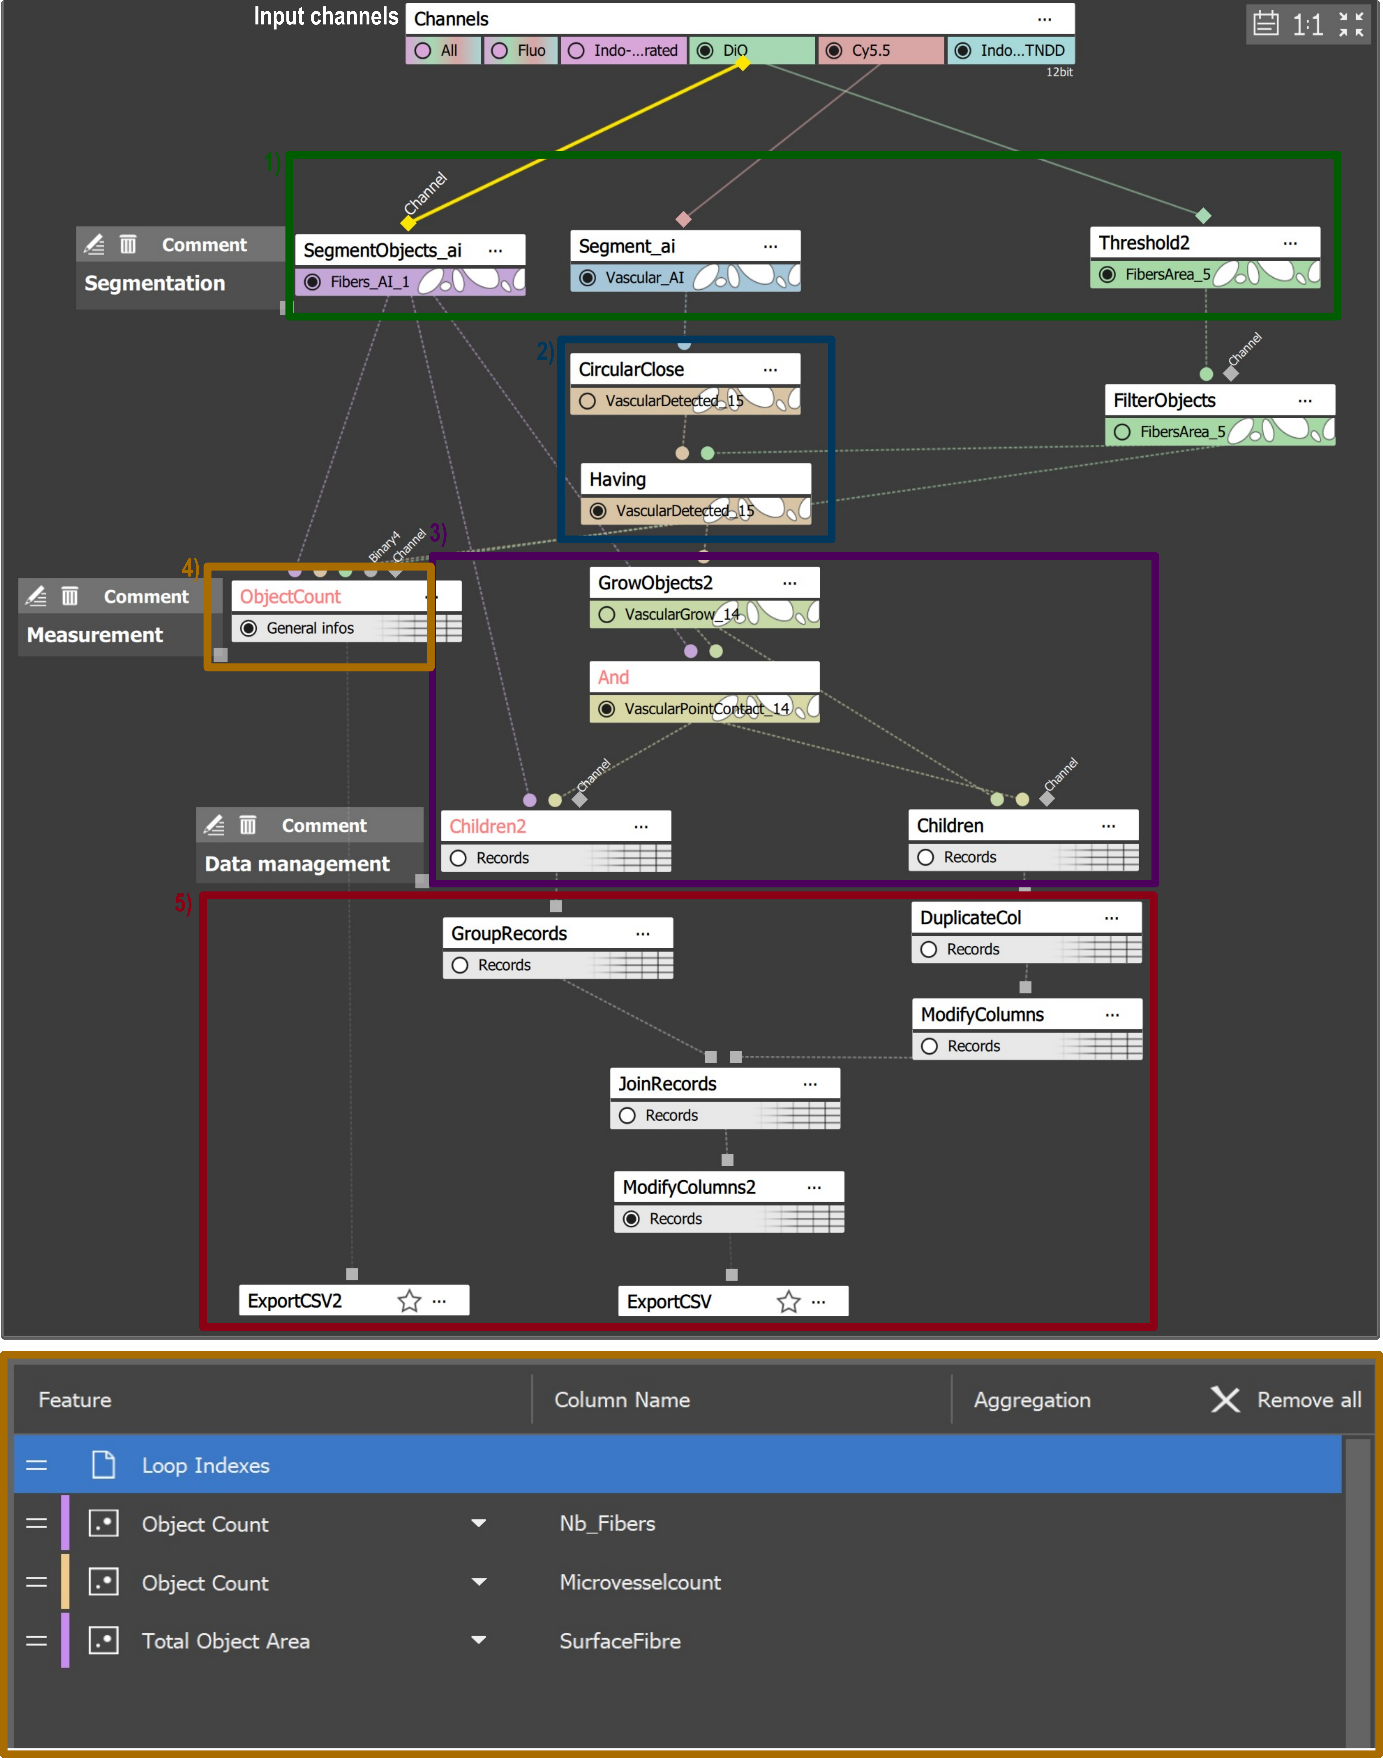
**

**Figure S3:** General Analysis 3 (GA3) Pipeline for 2D vasculature and muscle fiber feature extraction.The GA3 pipeline was developed to extract features related to vasculature and muscle fibers from 2D images, integrating deep learning segmentation and binary operations to quantify interactions between these structures.

1. **Input and segmentation (Green Section):**
   - The pipeline begins by applying two U-Net-based deep learning models: one for segmenting green autofluorescent muscle fibers and the other for segmenting vasculature from the input channels.
   - The muscle fiber area was selected using manual thresholding. Since the entire area was needed, specific thresholding techniques were not required.
2. **Muscle fiber and vasculature measurement (Blue and Orange section):**
   - A binary operation, “Having,” was applied to isolate vasculature contained within the muscle fiber area.
   - Measurements were then conducted, including the number of fibers, number of microvessels, and the total muscle fiber surface area.
   - These data were subsequently used to calculate:
     - **Microvessel density** (relative to muscle fiber area).
     - **Microvessel-to-fiber ratio.**
3. **Muscle fiber and microvessel interaction analysis (Violet Section):**
   - Using the binary mask of microvessels, an area of proximity around each vessel was created with the “GrowingObject” algorithm.
   - An “AND” operation was performed between the expanded (grown) vessel regions and the muscle fiber mask to isolate areas within muscle fibers that were in close proximity to vessels.
   - Each identified area was assigned to a single microvessel and its corresponding muscle fiber for further analysis.
4. **Feature Extraction (Red Section):**
   - **Muscle fiber–microvessel contact:** Quantifies the number of vessels surrounding each muscle fiber.
   - **Sharing factor:** Quantifies the number of muscle fibers that are associated with a single vessel.

The pipeline outputs these results for downstream analysis, providing quantitative insights into the interaction between muscle fibers and vasculature.


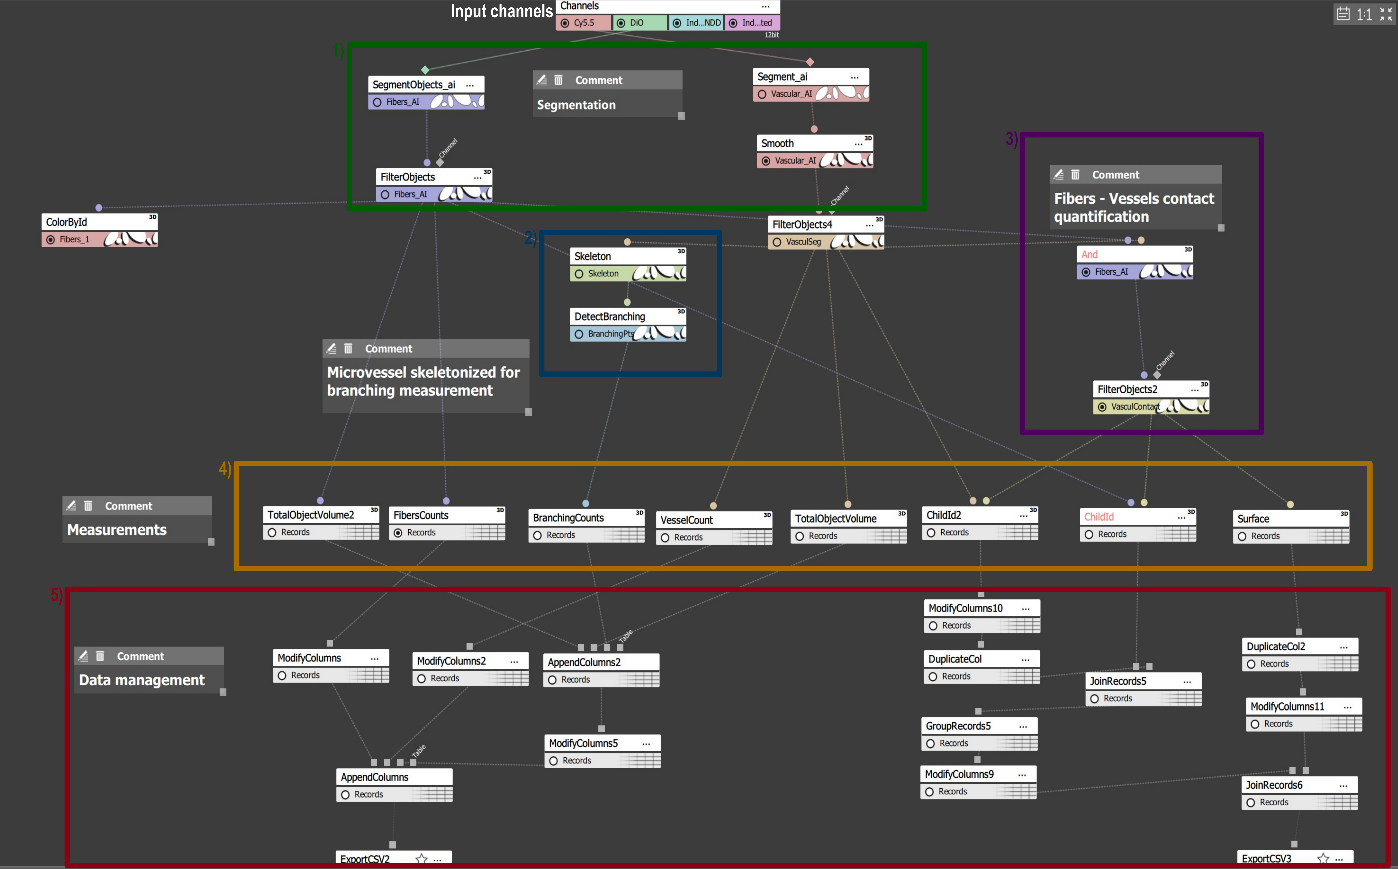


**Figure S4:** General Analysis 3 (GA3) Pipeline for 3D vasculature and muscle fiber feature extraction.The GA3 pipeline was developed to extract and quantify key features of vasculature and muscle fibers from 3D images, leveraging deep learning segmentation and advanced image processing techniques to investigate their interactions.

1. **Input and Segmentation (Green Section):**
   - The pipeline begins with the application of two U-Net-based deep learning models:
     - *Segment.Object.ai* for segmenting green autofluorescent muscle fibers.
     - *Segment.ai* for segmenting vasculature from the corresponding input channels.
2. **Vasculature Skeletonizing (Blue Section):**
   - Microvessels were skeletonized to extract their central axis.
   - Branching points were then detected along the skeleton to quantify the degree of vascular ramification.
3. **Vasculature Embedded Surface on Muscle Fibers (Violet Section):**
   - A binary operation was performed on the binary masks of muscle fibers and vasculature to isolate the surface of interaction between the two structures.
   - This enabled the quantification of the embedded surface area where vasculature interacts with muscle fibers.
4. **Quantifications (Orange Section):**
   - Various structural and interaction-related metrics were measured, including:
     - **Total volumes** of muscle fibers and vasculature, used to calculate vessel density relative to fibers.
     - **Counts of muscle fibers and vessels.**
     - **Branching points** of the vasculature, reflecting its structural complexity.
     - **Surface area of embedded vasculature**, which was linked to the corresponding muscle fibers and vessels for further analysis.

This 3D pipeline provides an integrated framework for characterizing the structural organization and interactions between vasculature and muscle fibers in a three-dimensional context.


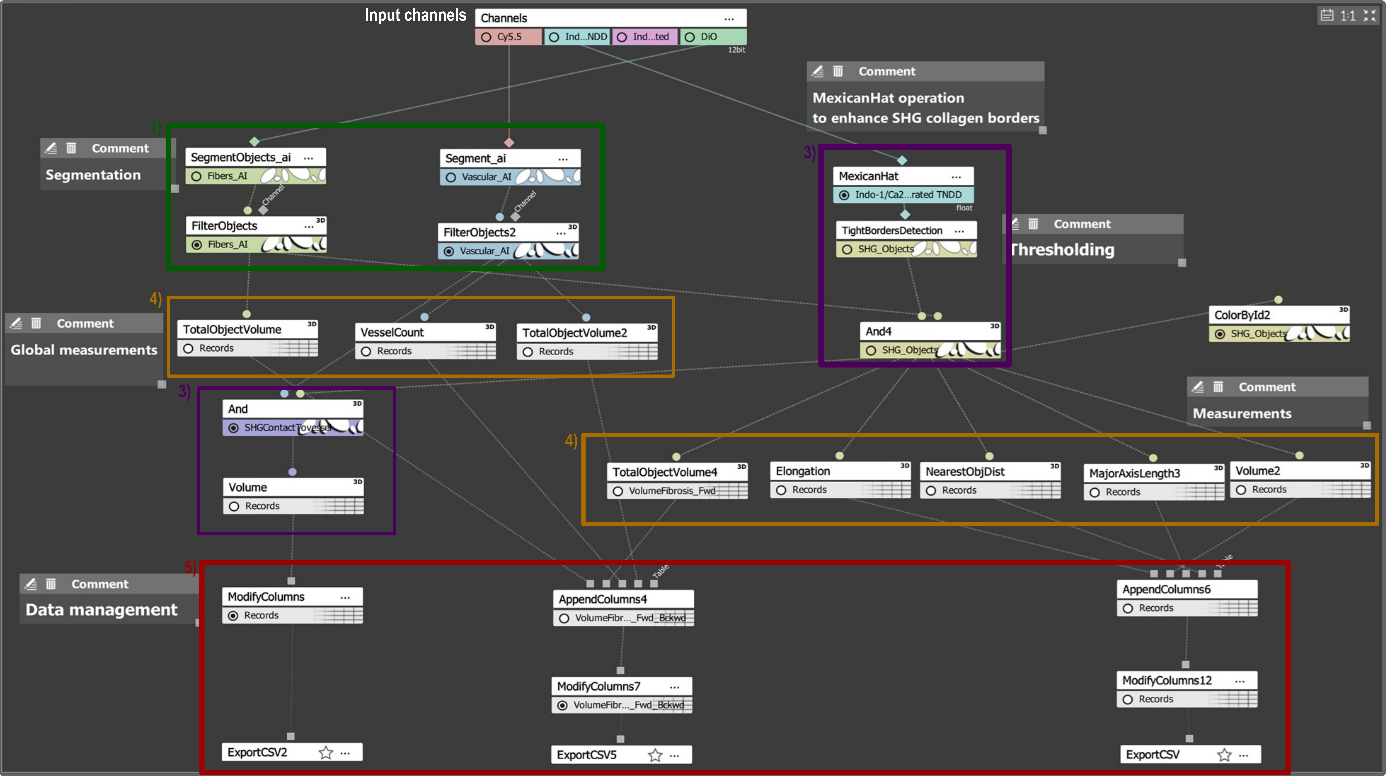


**Figure S5:** General Analysis 3 (GA3) Pipeline for 3D SHG-collagen feature extraction. The GA3 pipeline was developed to extract and quantify key features of SHG+ objects- from 3D images, integrating deep learning segmentation and advanced image preprocessing for detailed structural and interaction analysis.

**Input and Segmentation (Green Section):**

The pipeline starts with the application of two U-Net-based deep learning models:

*Segment.Object.ai* for segmenting green autofluorescent muscle fibers.

*Segment.ai* for segmenting vasculature from the corresponding input channels.

**SHG-Collagen Preprocessing and Segmentation (Violet Section):**

A Laplacian of Gaussian filter (also known as "Mexican Hat") with a sigma parameter set to 2.7 was applied to enhance SHG+ network boundaries.

Edge-based thresholding was performed on the processed SHG signal to segment the SHG+ objects.

Two binary "AND" operations were used for further refinement: The first operation between muscle fiber masks and SHG+ objects isolated endomysial SHG for focused analysis.

The second operation between SHG+ objects and vasculature masks identified regions where microvessels and SHG+ objects overlapped.

**Feature Measurements (Orange Section):**

Key metrics were extracted, including: Total volumes of muscle fibers and SHG+ objects, enabling the calculation of SHG+ objects network density relative to fibers. Overlap volume between SHG+ objects and vasculature, quantifying their spatial interactions. Morphometric features of SHG+ objects, such as volume, elongation, and nearest-object distances to assess their structural characteristics.
